# Supplementary material for: Synaptotagmin-13 Is a Neuroendocrine Marker in Brain, Intestine and Pancreas
Source: MDPI journal article supplement (doi:10.3390/ijms222212526), 2021-11-20
Supplement: s1 [file s1]

## Supplementary Information

# Synaptotagmin-13 is a neuroendocrine marker in brain, intestine and pancreas

Marta Tarquis-Medina<sup>1,2,3</sup>, Katharina Scheibner<sup>1,2</sup>, Ismael Gonzalez Garcia<sup>2,4</sup>,  
Aimée Bastidas-Ponce<sup>1,2</sup>, Michael Sterr<sup>1,2</sup>, Jessica Jaki<sup>1,2</sup>, Silvia Schirge<sup>1,2</sup>,  
Cristina García-Cáceres<sup>2,4,5</sup>, Heiko Lickert<sup>1,2,3\*</sup>, Mostafa Bakhti<sup>1,2\*</sup>

**Supplementary Table S1.** Primer and gRNA sequences

| ID      | Sequence 5' - 3'        |
|---------|-------------------------|
| EP38    | CAAGATCCGCCACAACATCG    |
| EP420   | ATTGCATCGCATTGTCTGAGTAG |
| EP1240  | ATTCAACGGCACAGTCAA      |
| EP1241  | TGGATGCAGGGATGATGT      |
| EP 1640 | CCTACCCGGTAGAATTCGACGAC |
| EP1774  | CGAATTCCGGCTCACAAGTATC  |
| EP1775  | ACCAACTGCACCTGTAGTC     |
| EP1771  | GGGTATAGGCATGTGGACAG    |
| EP1772  | GGCTTGACTGGACAATGG      |
| EP1773  | GCGGACTTGAAGAAGTCG      |
| gRNA#1  | ACATGGCGATCTGCCGGCGTGGG |
| gRNA#10 | TGTAGTCGCCACCTGCCACCGG  |

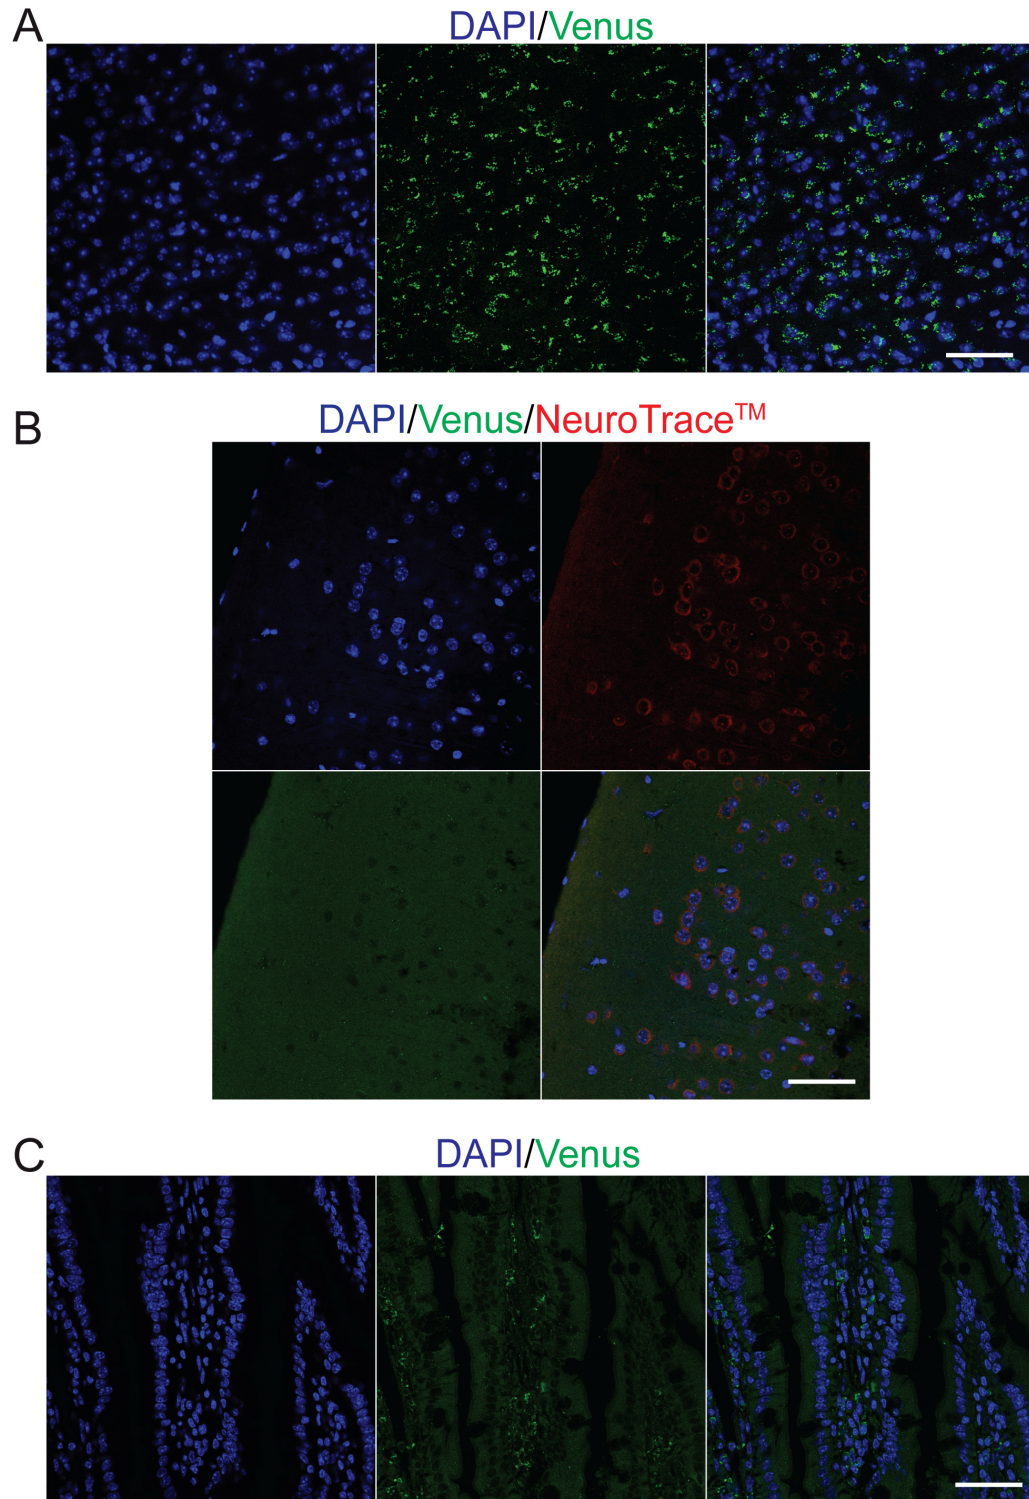

**Supplementary Figure S1. Negative control stainings.** (A) Maximum intensity projection image of cortex area from *Syt13<sup>VE/VE</sup>* mouse brain. Venus signal (green) is detectable even in the absence of Venus antibody. (B) Brain sections from WT animals stained with antibody against Venus (green) and NeuroTrace™ (red). No overlapping signals is observed between two channels. (C) Staining of duodenal section from WT animals shows a certain degree of unspecific background signal for Venus antibody. Scale bars 50  $\mu\text{m}$ .
